# Supplementary material for: Global Transcriptome Analysis of Brown Adipose Tissue of Diet-Induced Obese Mice
Source: MDPI journal article supplement (doi:10.3390/ijms19041095), 2018-04-06
Supplement: s1 [file s1]

PubMed Advanced Search Builder

Tutorial

Use the builder below to create your search

[Edit](#)[Clear](#)

Builder

All Fields ▾

[Show index list](#)

AND ▾

All Fields ▾

[Show index list](#)

Search

 or [Add to history](#)

History

[Download history](#) [Clear history](#)

| Search             | Add to builder      | Query                                                                                                               | Items found            | Time     |
|--------------------|---------------------|---------------------------------------------------------------------------------------------------------------------|------------------------|----------|
| <a href="#">#3</a> | <a href="#">Add</a> | Search (((brown adipose tissue) AND high fat diet)) AND (((microarray) OR RNA sequencing) OR RNA seq) OR sequencing | <a href="#">26</a>     | 11:24:43 |
| <a href="#">#2</a> | <a href="#">Add</a> | Search (((microarray) OR RNA sequencing) OR RNA seq) OR sequencing                                                  | <a href="#">439780</a> | 11:24:27 |
| <a href="#">#1</a> | <a href="#">Add</a> | Search (brown adipose tissue) AND high fat diet                                                                     | <a href="#">1069</a>   | 11:23:53 |

PubMed

(((brown adipose tissue) AND high fat diet)) AND (((microarray) OR RN

Format: Summary Sort by: Most Recent Per page: 50

## Search results

Items: 26

☐ [Cdkn2a deficiency promotes adipose tissue browning.](#)

1. Rabbi N, Hannou SA, Gromada X, Salas E, Yao X, Oger F, Carney C, Lopez-Mejia IC, Durand E, Rabearivelo I, Bonnefond A, Caron E, Fajas L, Dani C, Froguel P, Annicotte JS.

Mol Metab. 2017 Dec 1. pii: S2212-8778(17)30935-3. doi: 10.1016/j.molmet.2017.11.012. [Epub ahead of print]

PMID: 29237539 Free Article

☐ [Transcriptomic responses of the liver and adipose tissues to altered carbohydrate-fat ratio in diet: an isoenergetic study in young rats.](#)

2. Tanaka M, Yasuoka A, Shimizu M, Saito Y, Kumakura K, Asakura T, Nagai T.

Genes Nutr. 2017 Apr 8;12:10. doi: 10.1186/s12263-017-0558-2. eCollection 2017.

PMID: 28405243 Free PMC Article

☐ [17β-Estradiol suppresses visceral adipogenesis and activates brown adipose tissue-specific gene expression.](#)

3. Al-Qahtani SM, Bryzgalova G, Valladolid-Acebes I, Korach-André M, Dahlman-Wright K, Efendić S, Berggren PO, Portwood N.

Horm Mol Biol Clin Investig. 2017 Jan 1;29(1):13-26. doi: 10.1515/hmbci-2016-0031.

PMID: 27831918

☐ [Pharmacologic activation of estrogen receptor β increases mitochondrial function, energy expenditure, and brown adipose tissue.](#)

4. Ponnusamy S, Tran QT, Harvey I, Smallwood HS, Thiyagarajan T, Banerjee S, Johnson DL, Dalton JT, Sullivan RD, Miller DD, Bridges D, Narayanan R.

FASEB J. 2017 Jan;31(1):266-281. doi: 10.1096/fj.201600787RR. Epub 2016 Oct 12.

PMID: 27733447 Free PMC Article

☐ [Six Tissue Transcriptomics Reveals Specific Immune Suppression in Spleen by Dietary Polyunsaturated Fatty Acids.](#)

5. Svahn SL, Våremo L, Gabrielsson BG, Peris E, Nookaew I, Grahnmö L, Sandberg AS, Wernstedt Asterholm I, Jansson JO, Nielsen J, Johansson ME.

PLoS One. 2016 May 11;11(5):e0155099. doi: 10.1371/journal.pone.0155099. eCollection 2016.

PMID: 27166587 Free PMC Article

☐ [Fucoidan alleviates high-fat diet-induced dyslipidemia and atherosclerosis in ApoE\(shl\) mice deficient in apolipoprotein E expression.](#)

6. Yokota T, Nomura K, Nagashima M, Kamimura N.

J Nutr Biochem. 2016 Jun;32:46-54. doi: 10.1016/j.jnutbio.2016.01.011. Epub 2016 Mar 8.

PMID: 27142736

☐ [Loss of Adipose Fatty Acid Oxidation Does Not Potentiate Obesity at Thermoneutrality.](#)

7. Lee J, Choi J, Aja S, Scafidi S, Wolfgang MJ.

Cell Rep. 2016 Feb 16;14(6):1308-1316. doi: 10.1016/j.celrep.2016.01.029. Epub 2016 Feb 4.

PMID: 26854223 Free PMC Article

- ☐ [Transcriptome profiling of white adipose tissue in a mouse model for 15q duplication syndrome.](#)
8. Liu X, Tamada K, Kishimoto R, Okubo H, Ise S, Ohta H, Ruf S, Nakatani J, Kohno N, Spitz F, Takumi T. Genom Data. 2015 Jul 10;5:394-6. doi: 10.1016/j.gdata.2015.06.035. eCollection 2015 Sep. PMID: 26484295 **Free PMC Article**
- ☐ [Gene expression profiles reveal effect of a high-fat diet on the development of white and brown adipose tissues.](#)
9. Kim HS, Ryoo ZY, Choi SU, Lee S. Gene. 2015 Jul 1;565(1):15-21. doi: 10.1016/j.gene.2015.03.077. Epub 2015 Apr 17. PMID: 25895476
- ☐ [A gain-of-function mutation in adenylate cyclase 3 protects mice from diet-induced obesity.](#)
10. Pitman JL, Wheeler MC, Lloyd DJ, Walker JR, Glynne RJ, Gekakis N. PLoS One. 2014 Oct 16;9(10):e110226. doi: 10.1371/journal.pone.0110226. eCollection 2014. PMID: 25329148 **Free PMC Article**
- ☐ [MitoNEET-mediated effects on browning of white adipose tissue.](#)
11. Kusminski CM, Park J, Scherer PE. Nat Commun. 2014 May 28;5:3962. doi: 10.1038/ncomms4962. PMID: 24865177 **Free PMC Article**
- ☐ [Adipose-specific knockout of SEIPIN/BSCL2 results in progressive lipodystrophy.](#)
12. Liu L, Jiang Q, Wang X, Zhang Y, Lin RC, Lam SM, Shui G, Zhou L, Li P, Wang Y, Cui X, Gao M, Zhang L, Lv Y, Xu G, Liu G, Zhao D, Yang H. Diabetes. 2014 Jul;63(7):2320-31. doi: 10.2337/db13-0729. Epub 2014 Mar 12. PMID: 24622797 **Free Article**
- ☐ [Hkat, a novel nutritionally regulated transmembrane protein in adipose tissues.](#)
13. Zhang R. Sci Rep. 2012;2:825. doi: 10.1038/srep00825. Epub 2012 Nov 14. PMID: 23152936 **Free PMC Article**
- ☐ [Nrac, a novel nutritionally-regulated adipose and cardiac-enriched gene.](#)
14. Zhang R, Yao F, Gao F, Abou-Samra AB. PLoS One. 2012;7(9):e46254. doi: 10.1371/journal.pone.0046254. Epub 2012 Sep 27. PMID: 23029450 **Free PMC Article**
- ☐ [Extrinsic and intrinsic regulation of DOR/TP53INP2 expression in mice: effects of dietary fat content, tissue type and sex in adipose and muscle tissues.](#)
15. Fromm-Dornieden C, Lytovchenko O, von der Heyde S, Behnke N, Hogl S, Berghoff J, Köpper F, Opitz L, Renne U, Hoefflich A, Beissbarth T, Brenig B, Baumgartner BG. Nutr Metab (Lond). 2012 Sep 21;9(1):86. doi: 10.1186/1743-7075-9-86. PMID: 22995226 **Free PMC Article**
- ☐ [Inhibition of myostatin protects against diet-induced obesity by enhancing fatty acid oxidation and promoting a brown adipose phenotype in mice.](#)
16. Zhang C, McFarlane C, Lokireddy S, Masuda S, Ge X, Gluckman PD, Sharma M, Kambadur R. Diabetologia. 2012 Jan;55(1):183-93. doi: 10.1007/s00125-011-2304-4. Epub 2011 Sep 17. Erratum in: [Diabetologia. 2015 Mar;58\(3\):643.](#) PMID: 21927895

- ☐ [Disruption of hypoxia-inducible factor 1 in adipocytes improves insulin sensitivity and decreases adiposity in high-fat diet-fed mice.](#)  
17. Jiang C, Qu A, Matsubara T, Chanturiya T, Jou W, Gavrilova O, Shah YM, Gonzalez FJ.  
Diabetes. 2011 Oct;60(10):2484-95. doi: 10.2337/db11-0174. Epub 2011 Aug 26.  
PMID: 21873554 **Free PMC Article**
- ☐ [Similarity of mouse perivascular and brown adipose tissues and their resistance to diet-induced inflammation.](#)  
18. Fitzgibbons TP, Kogan S, Aouadi M, Hendricks GM, Straubhaar J, Czech MP.  
Am J Physiol Heart Circ Physiol. 2011 Oct;301(4):H1425-37. doi: 10.1152/ajpheart.00376.2011. Epub 2011 Jul 15.  
PMID: 21765057 **Free PMC Article**
- ☐ [Gene expression profiling of adipose tissues in obesity susceptible and resistant rats under a high fat diet.](#)  
19. Joo JI, Yun JW.  
Cell Physiol Biochem. 2011;27(3-4):327-40. doi: 10.1159/000327959. Epub 2011 Apr 1.  
PMID: 21471722 **Free Article**
- ☐ [Pharmacogenomics of metabolic effects of rosiglitazone.](#)  
20. Seda O, Sedová L, Oliarynyk O, Kazdová L, Krenová D, Corbeil G, Hamet P, Tremblay J, Kren V.  
Pharmacogenomics. 2008 Feb;9(2):141-55. doi: 10.2217/14622416.9.2.141.  
PMID: 18370844
- ☐ [Relations of adipose tissue CIDEA gene expression to basal metabolic rate, energy restriction, and obesity: population-based and dietary intervention studies.](#)  
21. Gummesson A, Jernås M, Svensson PA, Larsson I, Glad CA, Schéle E, Gripeteg L, Sjöholm K, Lystig TC, Sjöström L, Carlsson B, Fagerberg B, Carlsson LM.  
J Clin Endocrinol Metab. 2007 Dec;92(12):4759-65. Epub 2007 Sep 25.  
PMID: 17895319
- ☐ [Short-term resistance to diet-induced obesity in A/J mice is not associated with regulation of hypothalamic neuropeptides.](#)  
22. Bullen JW Jr, Ziotopoulou M, Ungsunan L, Misra J, Alevizos I, Kokkotou E, Maratos-Flier E, Stephanopoulos G, Mantzoros CS.  
Am J Physiol Endocrinol Metab. 2004 Oct;287(4):E662-70.  
PMID: 15361355
- ☐ [Segment of rat chromosome 20 regulates diet-induced augmentations in adiposity, glucose intolerance, and blood pressure.](#)  
23. Pausova Z, Sedova L, Berube J, Hamet P, Tremblay J, Dumont M, Gaudet D, Pravenec M, Kren V, Kunes J.  
Hypertension. 2003 May;41(5):1047-55. Epub 2003 Mar 24.  
PMID: 12654711 **Free Article**
- ☐ [BFIT, a unique acyl-CoA thioesterase induced in thermogenic brown adipose tissue: cloning, organization of the human gene and assessment of a potential link to obesity.](#)  
24. Adams SH, Chui C, Schilbach SL, Yu XX, Goddard AD, Grimaldi JC, Lee J, Dowd P, Colman S, Lewin DA.  
Biochem J. 2001 Nov 15;360(Pt 1):135-42.  
PMID: 11696000 **Free PMC Article**
- ☐ [Regulation of PPAR gamma gene expression by nutrition and obesity in rodents.](#)  
25. Vidal-Puig A, Jimenez-Liñan M, Lowell BB, Hamann A, Hu E, Spiegelman B, Flier JS, Moller DE.  
J Clin Invest. 1996 Jun 1;97(11):2553-61.  
PMID: 8647948 **Free PMC Article**

☐ [Pharmacologic manipulation of ob expression in a dietary model of obesity.](#)

26. Collins S, Surwit RS.  
J Biol Chem. 1996 Apr 19;271(16):9437-40.  
PMID: 8621612 **Free Article**

[Back to top](#)
